# Supplementary material
Source: MDPI journal article supplement (https://www.mdpi.com/2227-7102/11/5/198)

# Coding as Literacy at Preschool: A Case Study

## Supplementary material

Table S 1 - Learning methodologies per approach to computation and content area

| Approach to computation / Content area | Expression and Communication                                                                                                                                                                                                                                                                    | Knowledge of the World                         | Multidisciplinary                                                                                                                    |
|----------------------------------------|-------------------------------------------------------------------------------------------------------------------------------------------------------------------------------------------------------------------------------------------------------------------------------------------------|------------------------------------------------|--------------------------------------------------------------------------------------------------------------------------------------|
| Computational thinking (with ICT)      | -                                                                                                                                                                                                                                                                                               | field trip / itinerary representation          | storytelling with cubes<br>recipe planning/execution                                                                                 |
| Unplugged computational thinking       | game/challenges (floor activities, role-play embodiment, board, worksheet pixel-art); drawing/representation; itinerary representation; recipe; role-play/embodiment (child as a robot); sequencing/pattern (visual, 3d art, worksheet); storytelling/visual storytelling; algorithm worksheets | recipe concept map / diagram<br>storytelling   | nursery rhymes/singing<br>storytelling,<br>drawing/representation<br>free play                                                       |
| Coding                                 | random sequence building (ScratchJr)                                                                                                                                                                                                                                                            | ScratchJr self-directed exploration            | storytelling with ScratchJr<br>thematic project (Christmas card)                                                                     |
| Robotics                               | thematic coding challenges<br>self-directed exploration<br>storytelling                                                                                                                                                                                                                         | coding challenges<br>self-directed exploration | self-directed exploration<br>coding challenges (storytelling, floor game, thematic, no theme)                                        |
| Multiple approaches                    | role-play/embodiment (child-robot)                                                                                                                                                                                                                                                              | -                                              | itinerary planning/ representation<br>storytelling with ScratchJr<br>(visual) storytelling<br>tangible pattern building (3d objects) |

**Table S 2 - Curricular content per approach to computation and content area**

| <b>Approach to computation / Content area</b> | <b>Expression and Communication</b>                                                                                                                                                                                                                                                                                                                                                                        | <b>Knowledge of the World</b>                 | <b>Multidisciplinary</b>                                                                                                                                                                                                                                                                                              |
|-----------------------------------------------|------------------------------------------------------------------------------------------------------------------------------------------------------------------------------------------------------------------------------------------------------------------------------------------------------------------------------------------------------------------------------------------------------------|-----------------------------------------------|-----------------------------------------------------------------------------------------------------------------------------------------------------------------------------------------------------------------------------------------------------------------------------------------------------------------------|
| <b>Computational thinking (with ICT)</b>      | -                                                                                                                                                                                                                                                                                                                                                                                                          | Local natural and social environment          | Democracy and citizenship<br>identity and self-esteem<br>Feeling capable and enjoying learning<br>oral language and written approach<br>geometric shapes<br>information selection<br>visual language<br>paper cutting<br>ICT                                                                                          |
| <b>Unplugged computational thinking</b>       | approaches to writing<br>approaches to reading<br>oral language<br>algorithm<br>orientation concepts<br>conceptual map<br>numbers<br>notions of space/direction<br>patterns<br>routes<br>spatial reasoning<br>geometric figures<br>graphic register<br>body awareness/body control<br>manual dexterity<br>fine motor skills<br>cutting and pasting<br>colors<br>curiosity and interest<br>days of the week | festivities<br>autumn fruits<br>traffic rules | home/family<br>transportation<br>festivities (three kings day)<br>oral language<br>visual language<br>patterns<br>feeling able and enjoying learning                                                                                                                                                                  |
| <b>Coding</b>                                 | Oral language                                                                                                                                                                                                                                                                                                                                                                                              | ScratchJr                                     | approach to writing<br>oral language<br>ability and pleasure for learning<br>citizenship<br>identity and self-esteem<br>independence and autonomy<br>feeling capable and enjoying learning<br>natural scenes associated with christmas<br>Christmas<br>living beings<br>digital drawing<br>numbers<br>dramatic acting |

|                            |                                                                                                                                                                                                                                                                              |                                                                                         |                                                                                                                                                                                                                                                                                                                                                                                                                                           |
|----------------------------|------------------------------------------------------------------------------------------------------------------------------------------------------------------------------------------------------------------------------------------------------------------------------|-----------------------------------------------------------------------------------------|-------------------------------------------------------------------------------------------------------------------------------------------------------------------------------------------------------------------------------------------------------------------------------------------------------------------------------------------------------------------------------------------------------------------------------------------|
|                            |                                                                                                                                                                                                                                                                              |                                                                                         | ScratchJr<br>animation of a narrative<br>digital drawing<br>tablet<br>digital postcard<br>QR code<br>safe use of technologies                                                                                                                                                                                                                                                                                                             |
| <b>Robotics</b>            | oral language<br>narrative<br>approaches to writing<br>letters<br>animals<br>colors<br>drawing<br>geometric shapes<br>geometry<br>measurement<br>numbers and<br>operations<br>data organization and<br>processing<br>orientation and<br>spatial visualization<br>programming | educational<br>(tangible<br>programming)<br>educational<br>(directional<br>programming) | robot<br><br>robot<br><br>approaches to writing<br>approach to reading<br>oral language<br>democracy and citizenship<br>identity and self-esteem<br>independence and autonomy<br>visual communication<br>elements<br>visual language<br>family<br>social belonging<br>world places and cultures<br>geometric shapes<br>geometry<br>measurement<br>numbers and operations<br>robot programming<br>feeling capable and enjoying<br>learning |
| <b>Multiple approaches</b> | -                                                                                                                                                                                                                                                                            | -                                                                                       | nutrition<br>body<br>outer space<br>oral language<br>visual language<br>drawing<br>directions, paths<br>patterns<br>participation in Code week<br>Scratchjr<br>interactive whiteboard<br>feeling capable and enjoying<br>learning                                                                                                                                                                                                         |

---

### Learning goals per approach to computation and content area

Regarding computational thinking activities with commonly used ICT, learning goals split in two branches: 'world knowledge' and 'multidisciplinary' purposes (figure S1). 'World knowledge' wise, our analysis rather points to 'multidisciplinary' goals, with social world competencies, such as achieving a sense of belonging and knowledge of local culture, pursued together with mathematical competencies, notably spatial awareness and organizing information through conceptual maps. Regarding 'multidisciplinary' purposes, 'personal and social' competences, such as respect, cooperation and participation, go hand in hand with broad 'world knowledge' themes, concerning natural, social and technological aspects.

**Figure S 1 - Learning goals: Computational thinking with ICT**

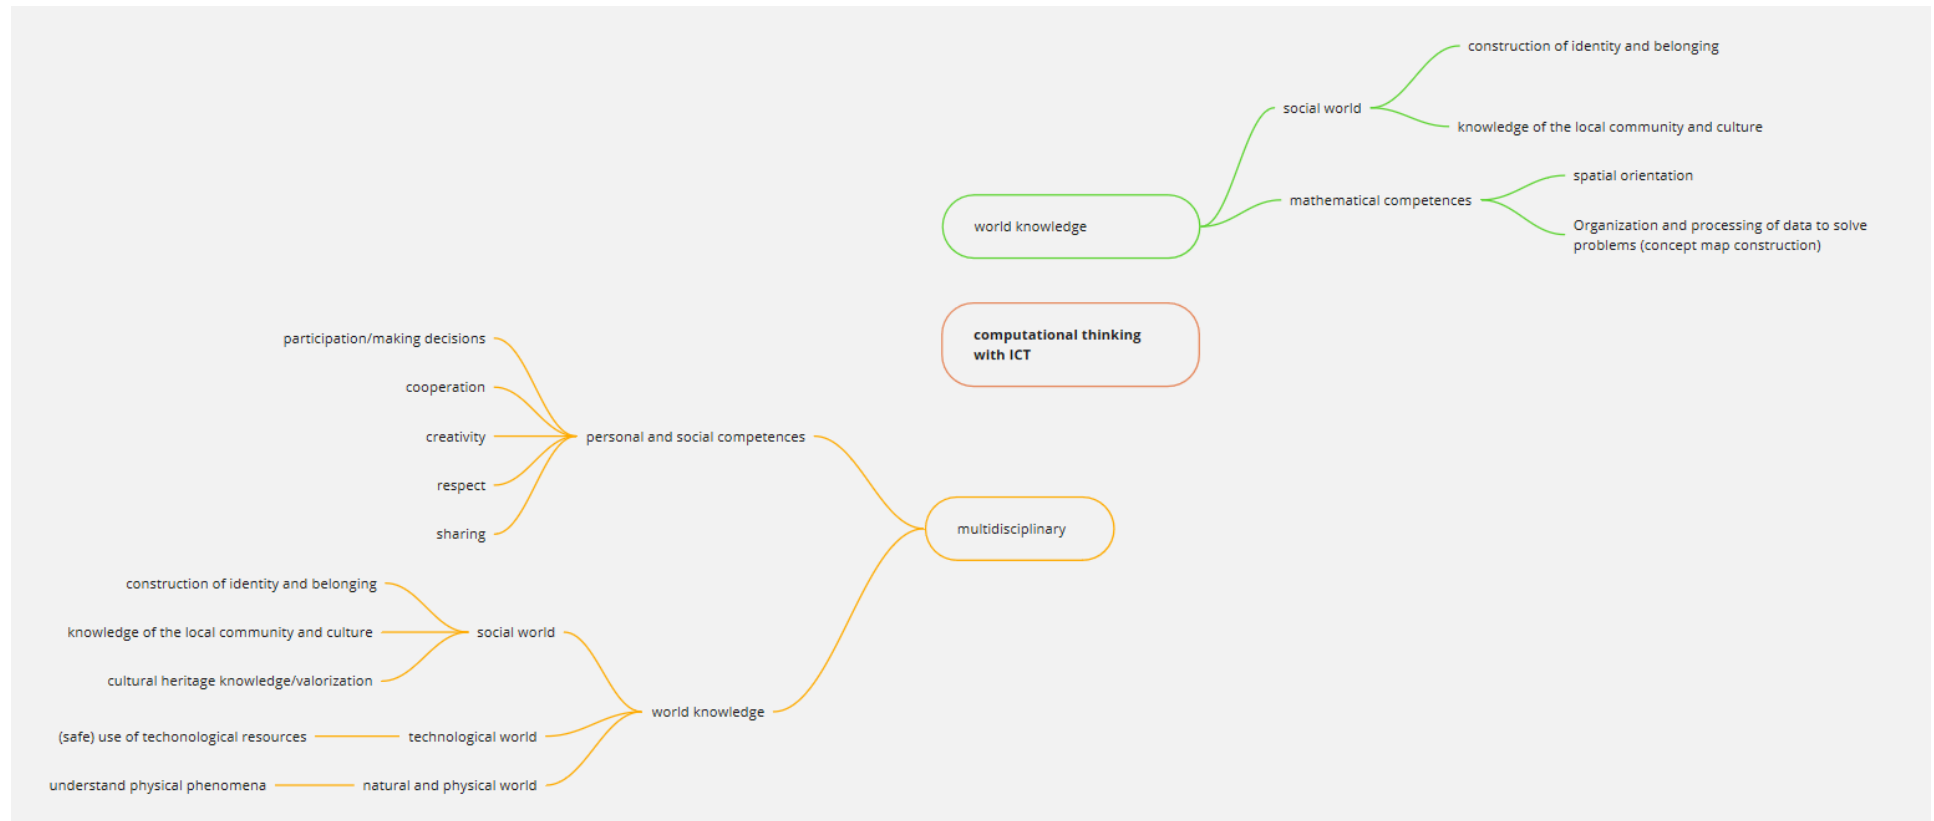

Unplugged computation activities offer a more complex map of objectives, encompassing all three main areas at pre-school's curricular matrix (figure S2). Together with the work developed within combined multiple approaches to computation, unplugged approaches directly mention pursuing 'personal and social' competencies objectives, such as sense of belonging, problem-solving and cooperation. With respect to 'world knowledge', our inductive analysis pointed to three branches: social world; natural and physical world; 'expression and communication' competencies.

**Figure S 2 - Learning goals: Unplugged computational thinking**

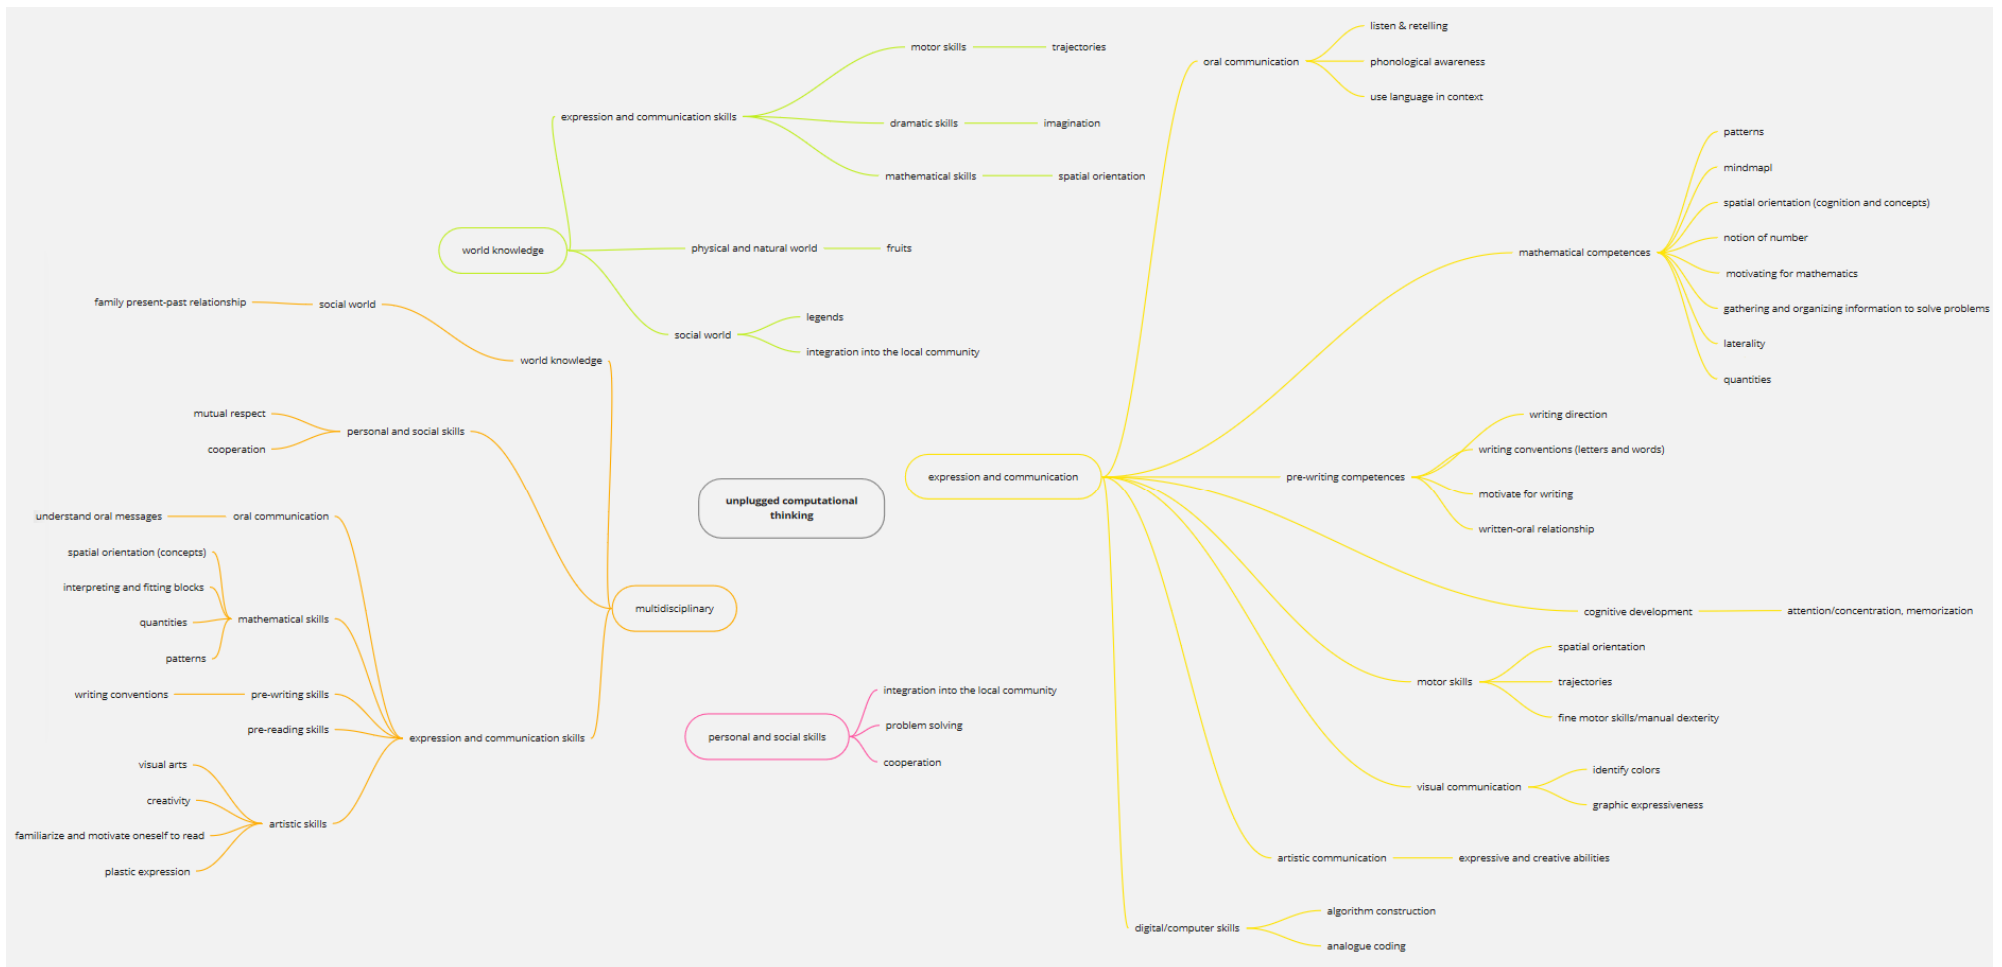

Resorting exclusively to ScratchJr as a coding environment, hence its prone storytelling design, objectives within this approach to computation emerged in close connection with storytelling related competences (figure S3). Educators' goals were set within 'world knowledge', 'expression and communication' and 'multidisciplinary' areas. Inductive analysis of 'world knowledge' activities branched into three themes: 'personal and social' competences; 'expression and communication'; 'technological world'. These approached, respectively: Development of cooperation and problem-solving competences; oral language (use in context) and mathematical notions; safe use of technology. 'Expression and communication' encompassed what could be considered computational expression and/or computational thinking, notably: sequence planning, problem solving, reflection, cooperation. 'Multidisciplinary' wise, the picture becomes more complex. Three themes emerge: objectives within 'personal and social' competences (self-knowledge, decision making, problem-solving, etc.), 'world knowledge' (social, natural and technological, respectively local community belonging, living beings, safe use of technology) and 'expression and communication' (oral, artistic, mathematical, etc.) (figure S3).

**Figure S3 - Learning goals: Coding**

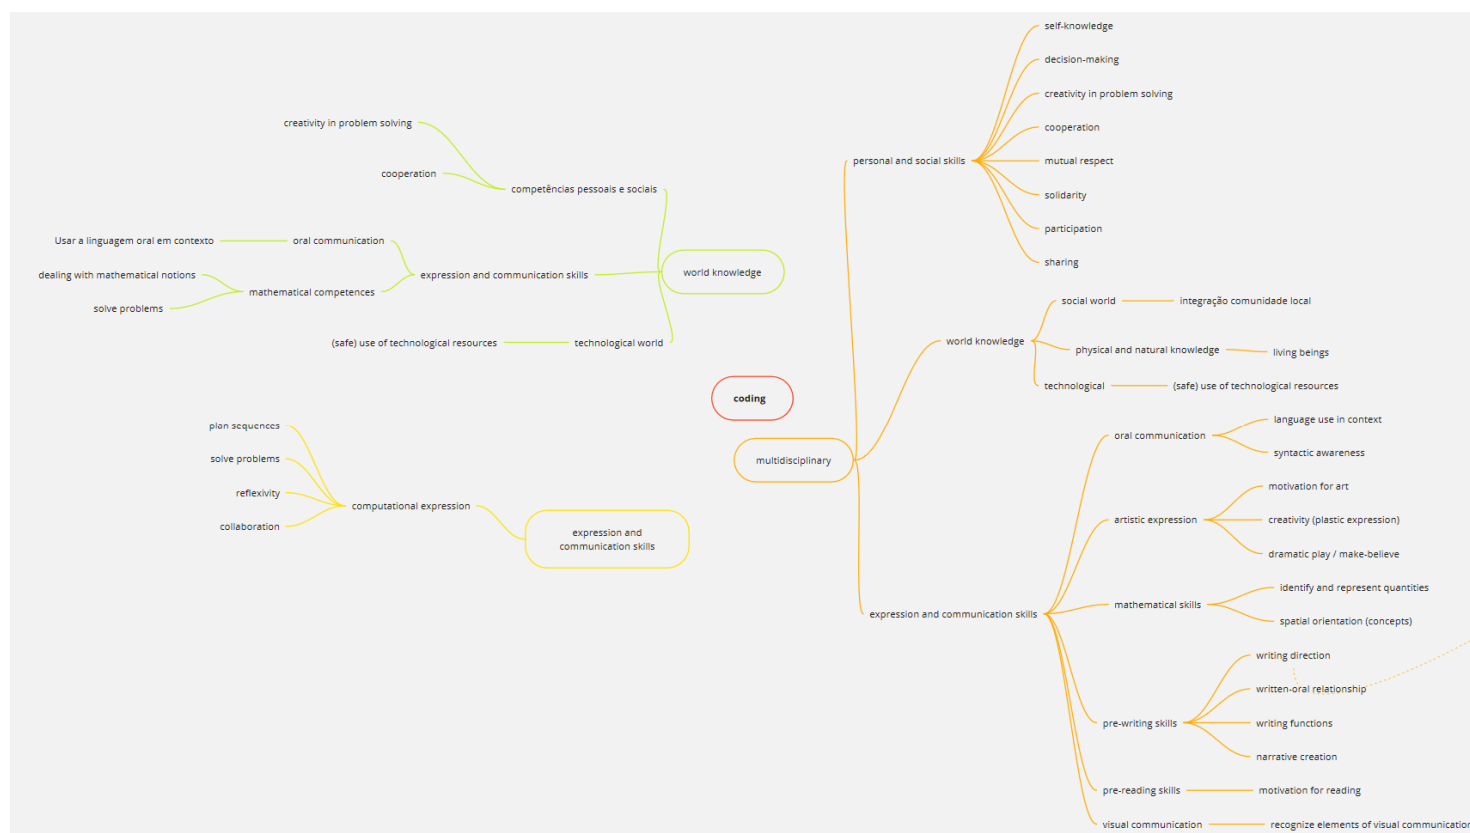

Robotics' mindmap presents a similarly complex and 'multidisciplinary' prone picture (figure S4). Educators distinguished three main knowledge areas: 'expression and communication', 'world knowledge' and 'multidisciplinary'. Our inductive analysis lenses rather points to an overall 'multidisciplinary' chart. 'expression and communication' competences surface across all branches, as well as 'personal and social' skills. Nonetheless, skills in the scope of 'expression and communication' stand out, in several domains: mathematical, visual, oral and pre-reading and writing. Computational related objectives appear in connection to 'expression and communication', but not exclusively. These are: programming and executing sequences; free exploration.

**Figure S 4 - Learning goals: Robotics**

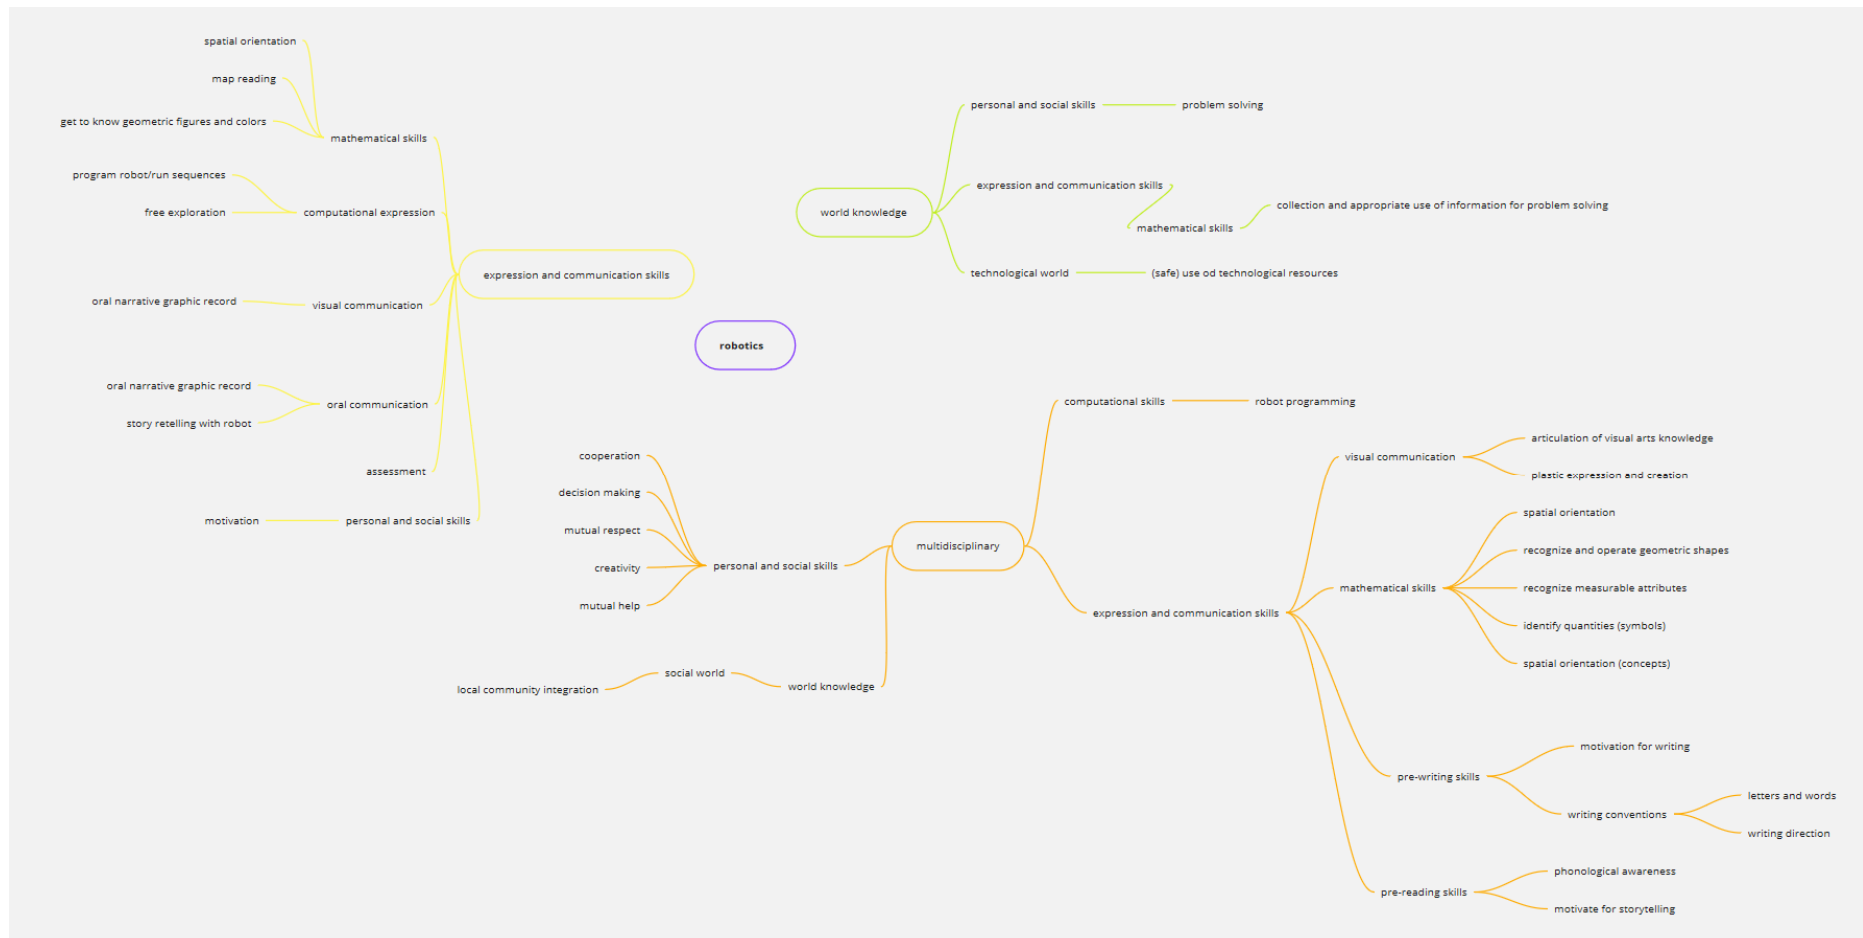

Concerning multiple approaches (figure S5), notably combining moments of unplugged and plugged activities, ‘expression and communication’ objectives largely prevailed as educators’ main targets. Besides a few remarks to knowledge about the technological world, cooperation and integration with other digital competences related projects, oral, visual, mathematical and computational competences emerged as sub-themes. In this case, as we will further discuss, computation falls under an ‘expression and communication’ category rather than a technological one. This aims to reflect how educators used computation as a means for children to express themselves rather than to directly develop technological skills in itself.

**Figure S 5 - Learning goals: multiple approaches**

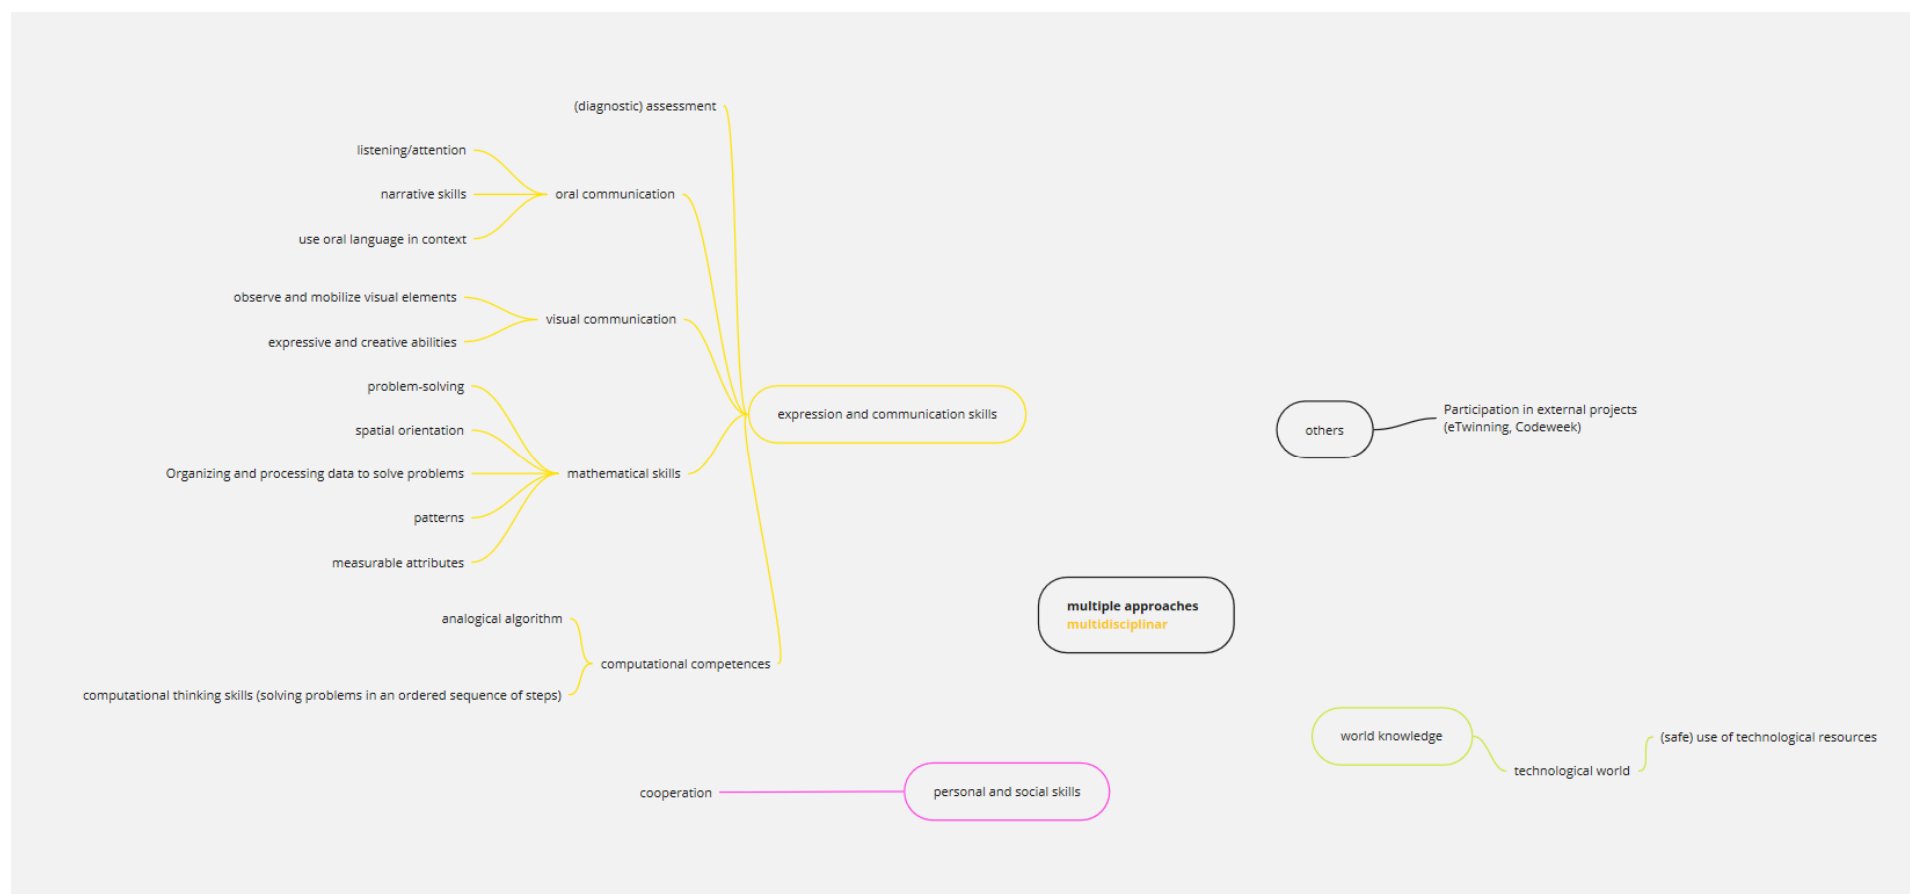



Figure S 6 - Children's reactions

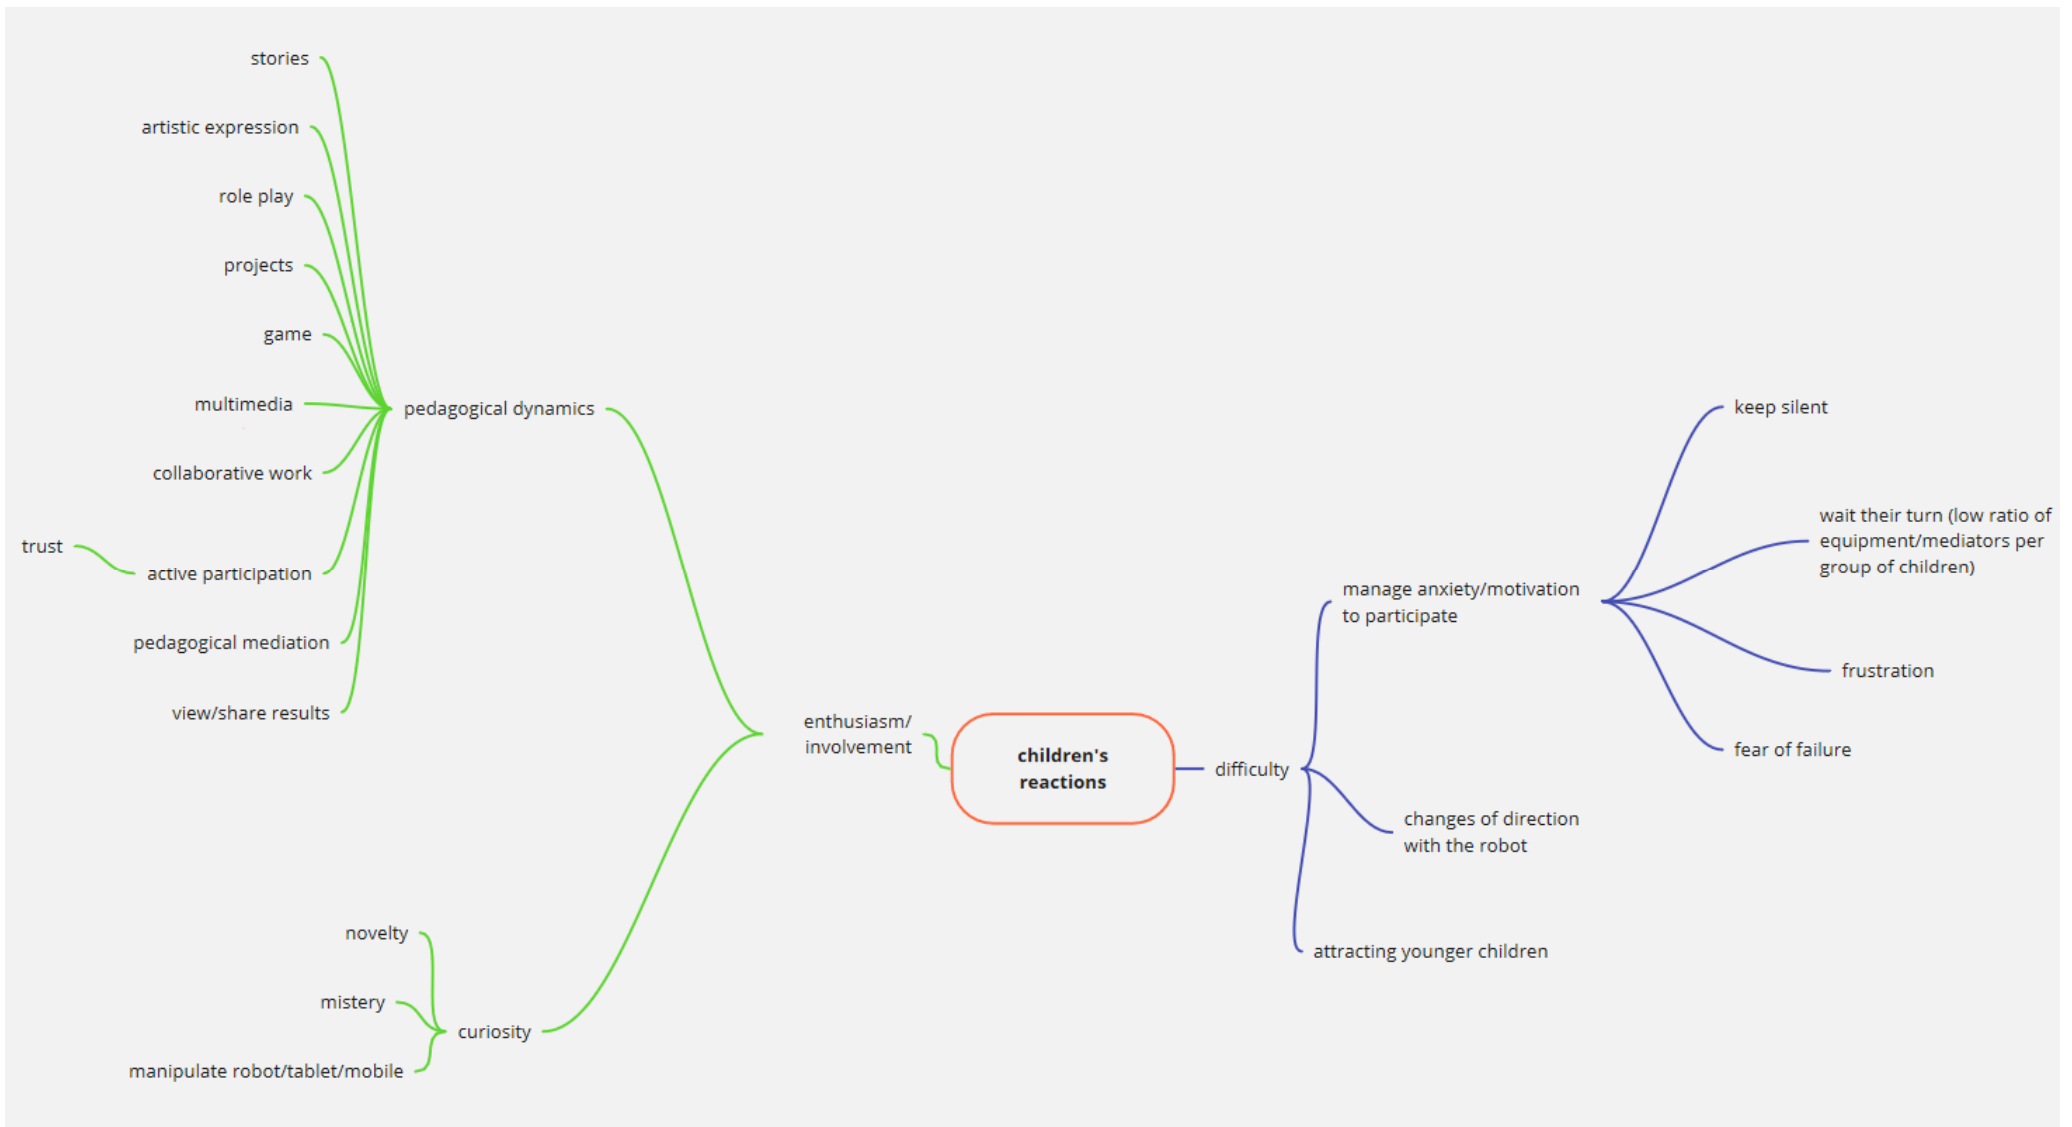

Figure S 7 - Positive aspects: Computational thinking with ICT

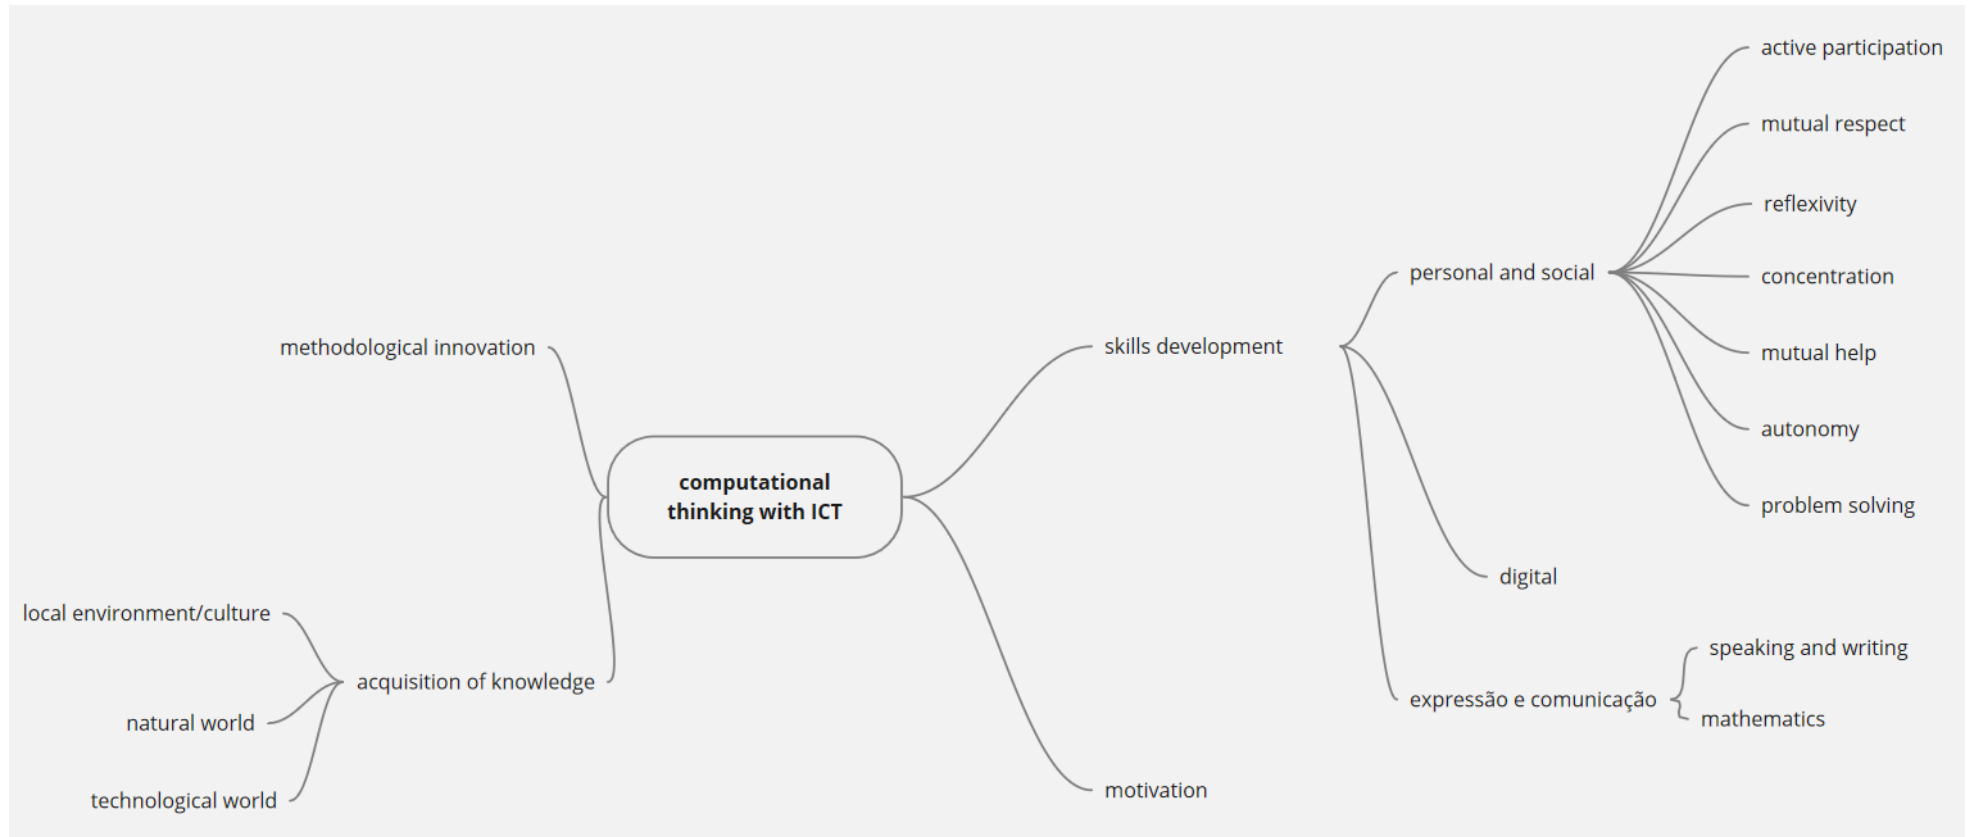

**Figure S 8 - Positive aspects: Unplugged computational thinking**

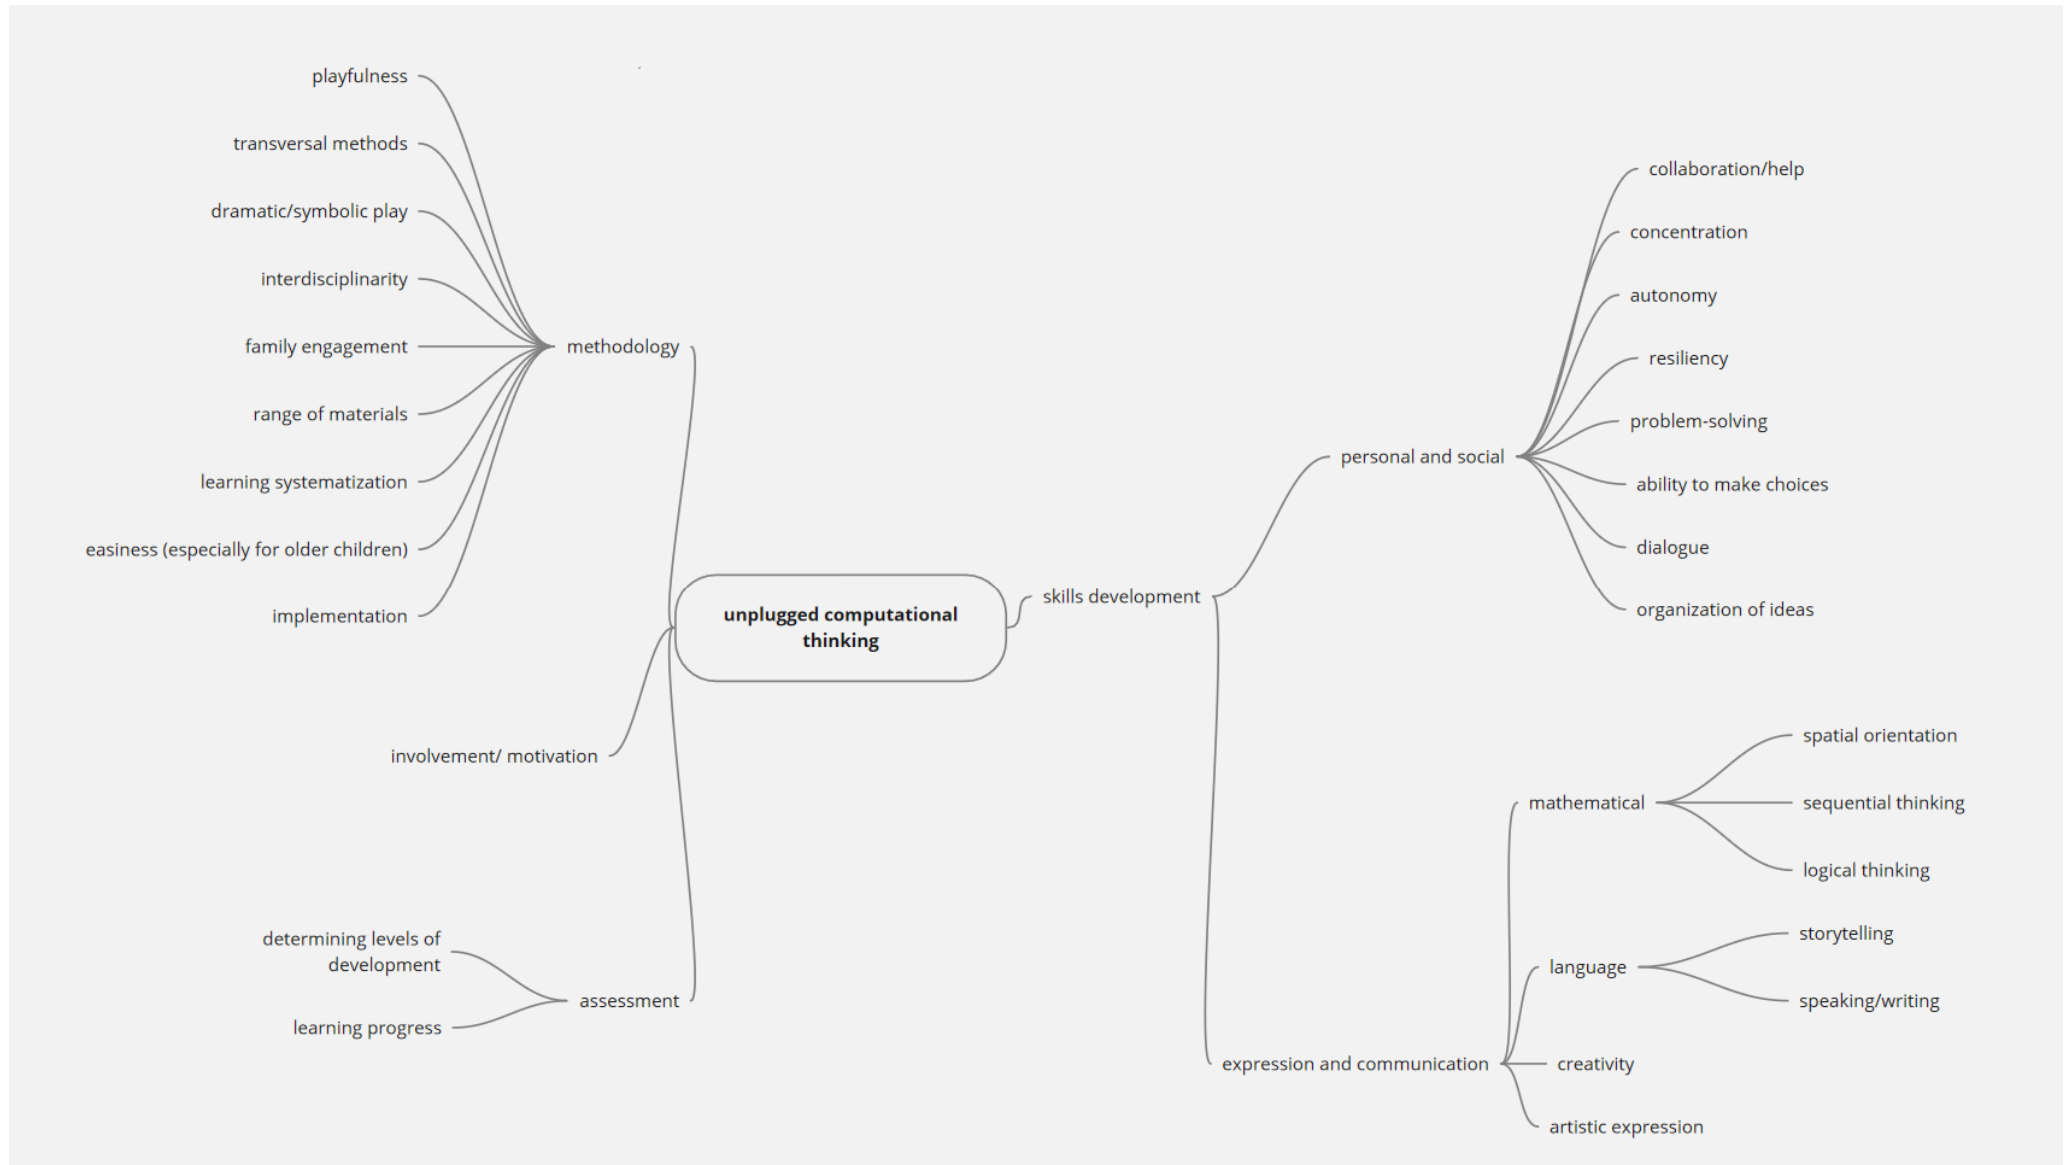

Figure S 9 - Positive aspects: Coding

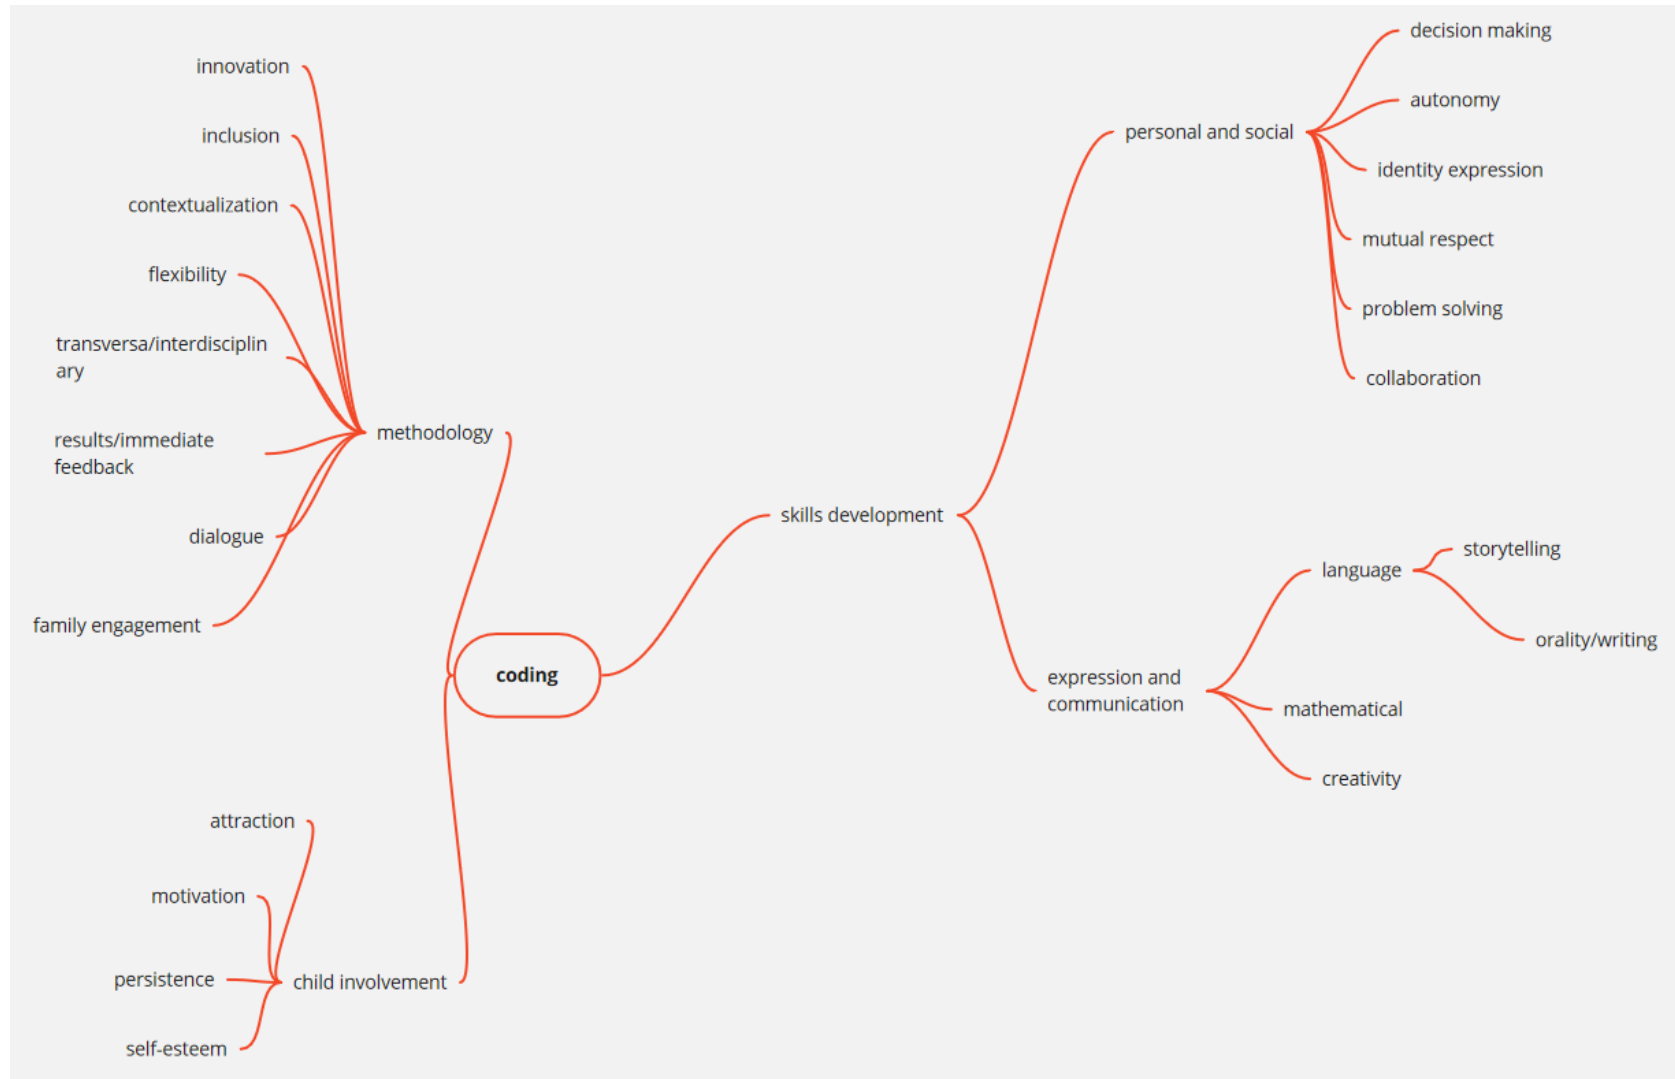

**Figure S 10 - Positive aspects: Robotics**

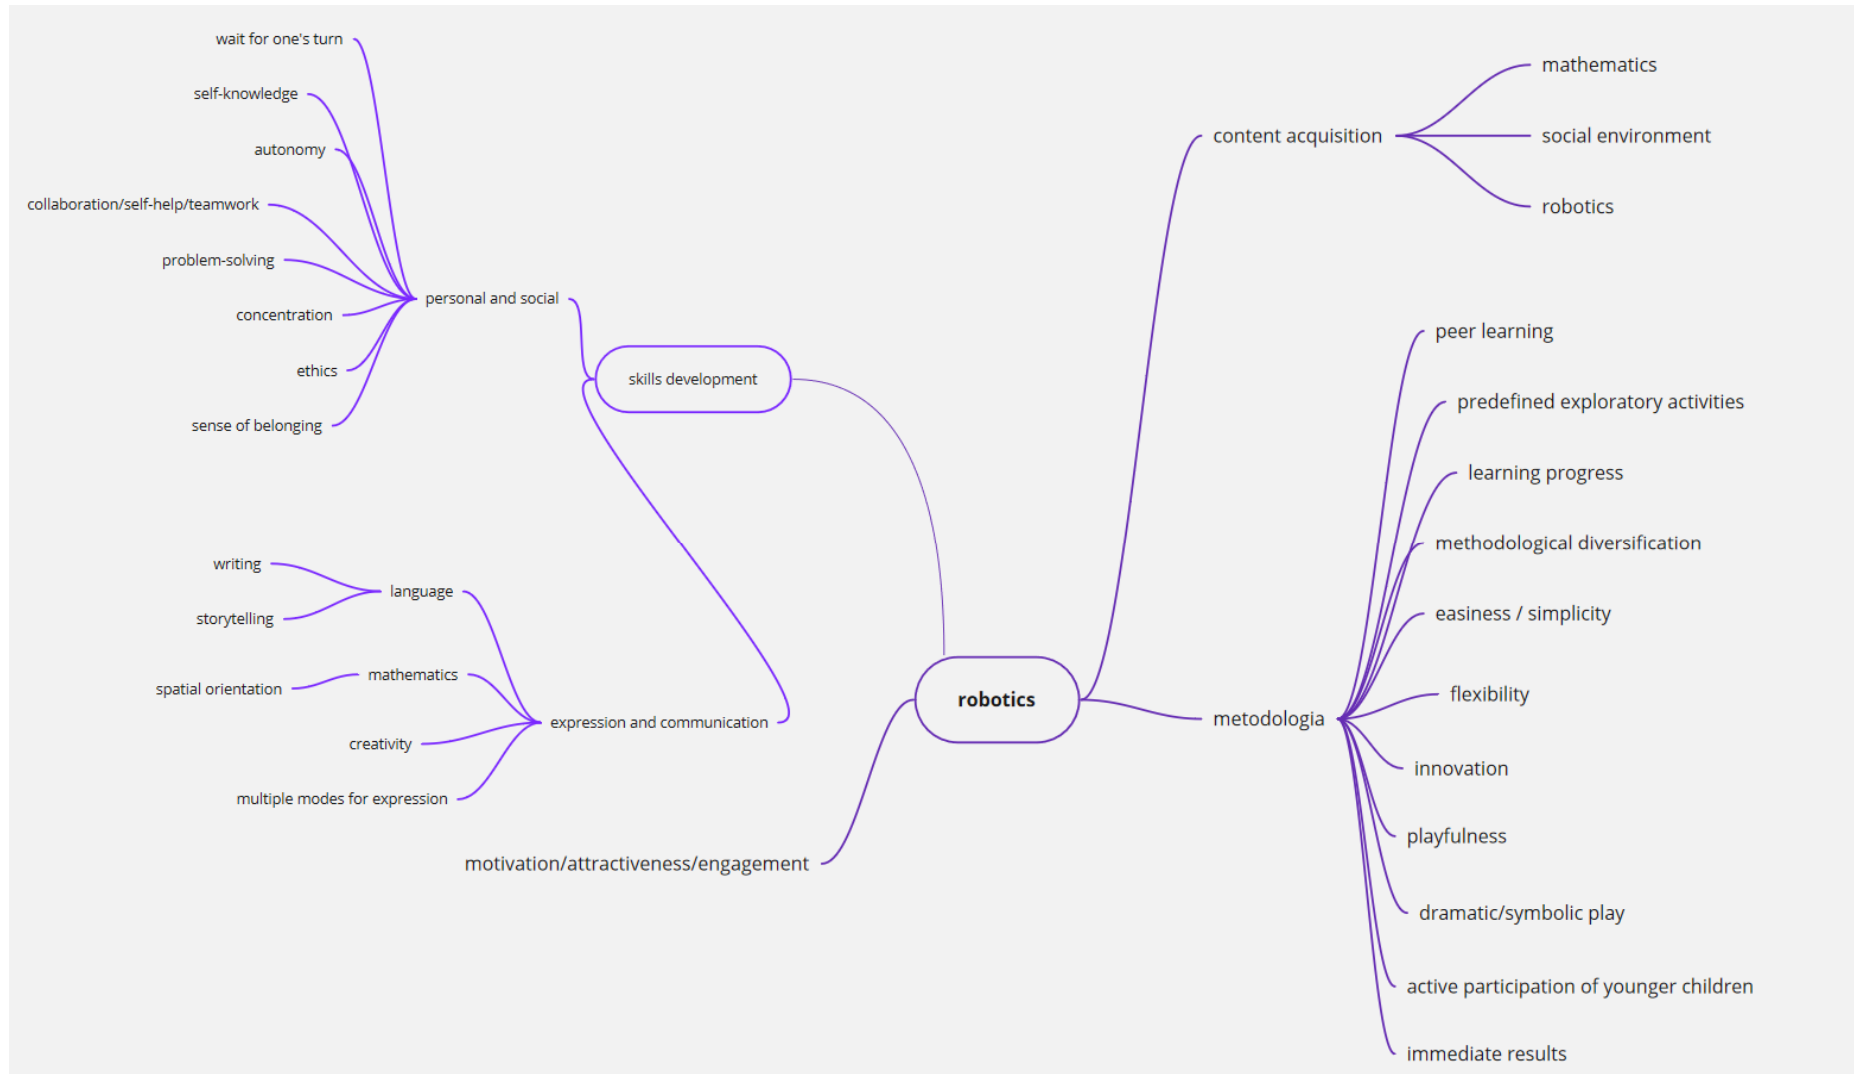

Figure S 11 - Positive aspects: Multiple approaches

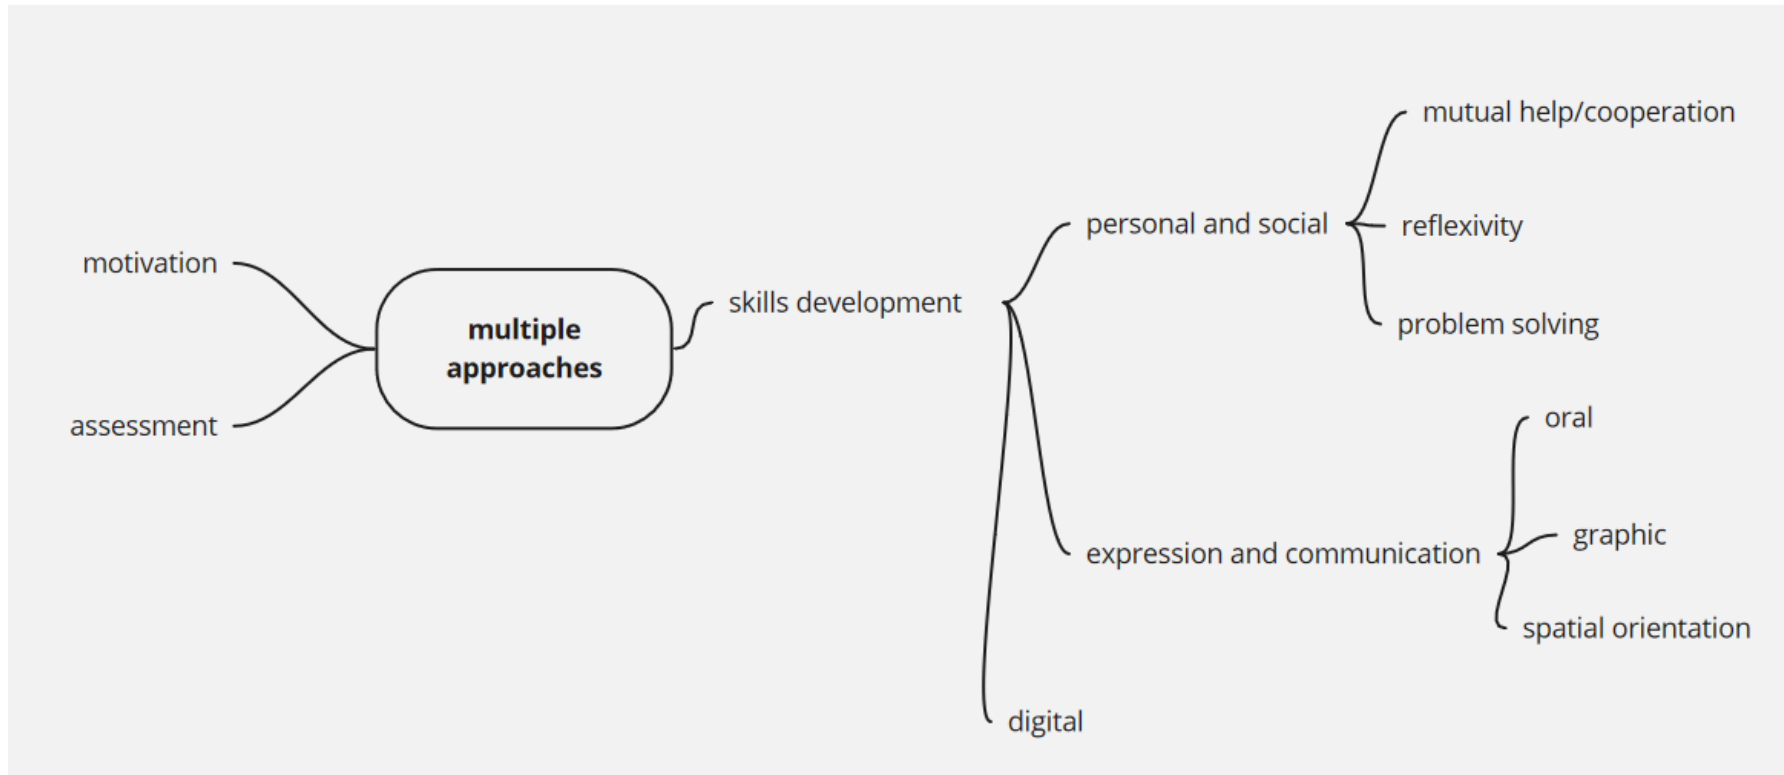

Figure S 12 - Negative aspects

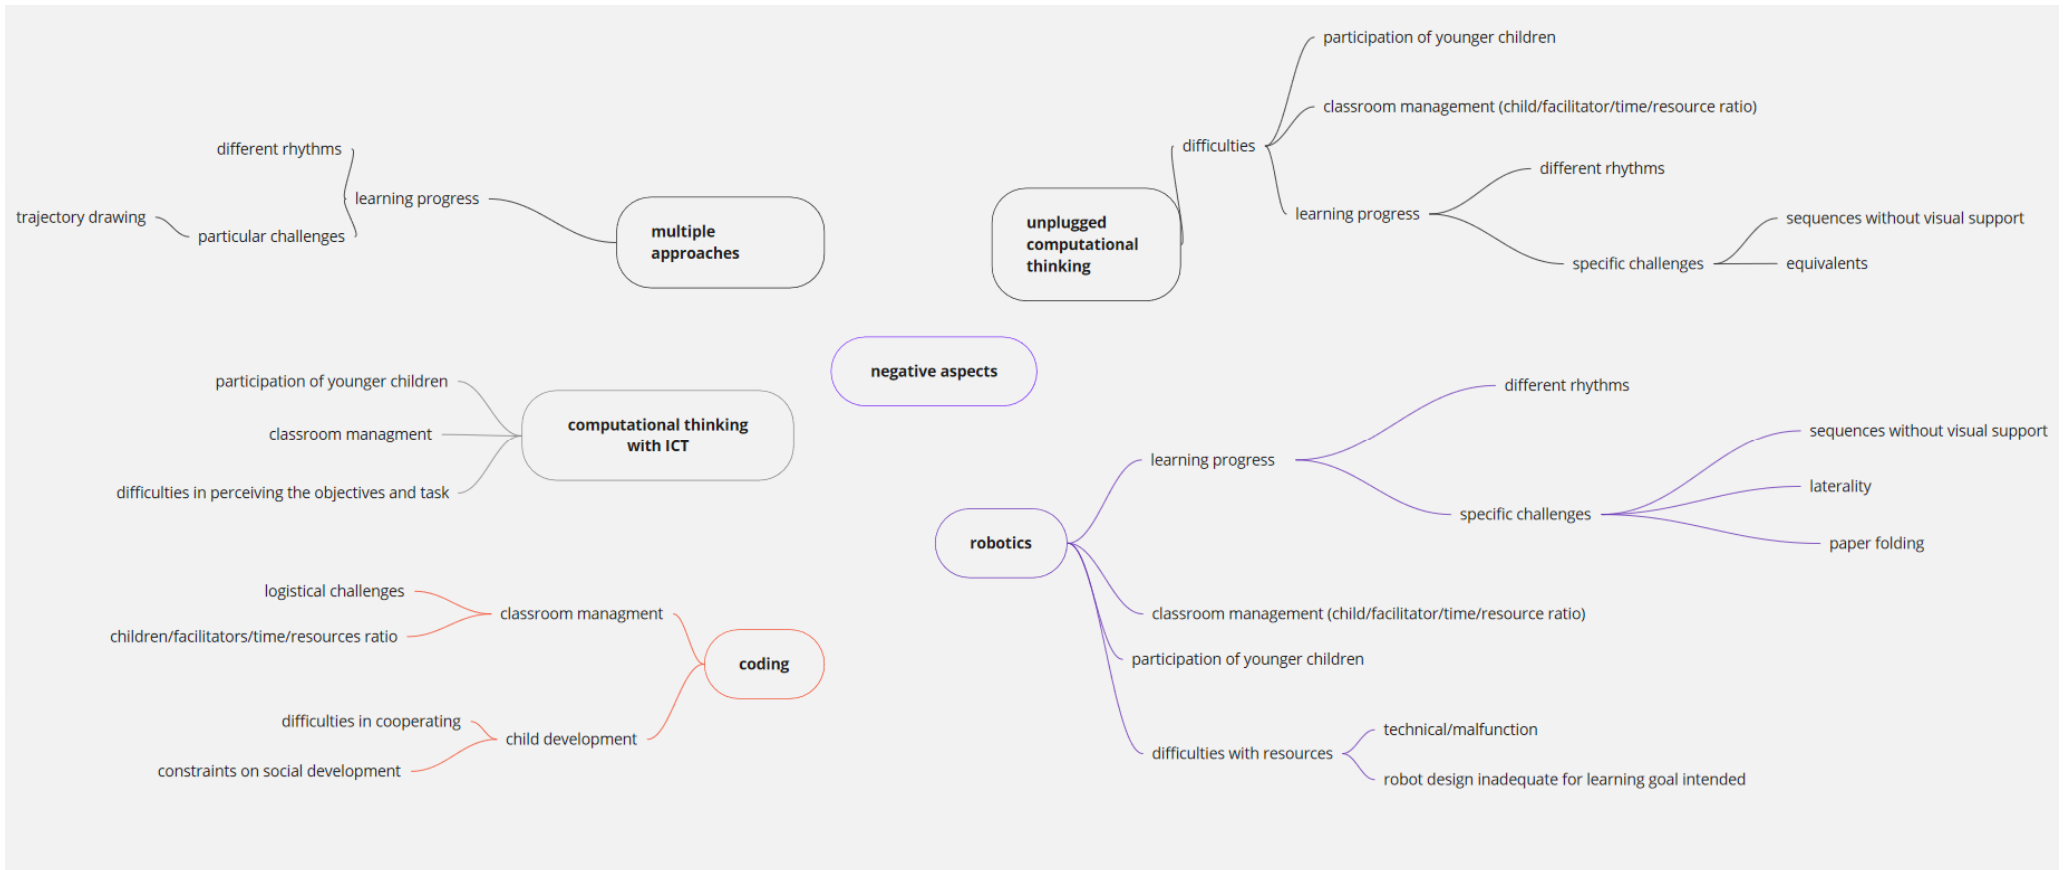

Supplement: s1 [file s1]
